# Supplementary material
Source: publisher site journal article supplement (https://www.dovepress.com/article/455146)
Supplement: Supplementary file 1 [file get_supplementary_file.php]

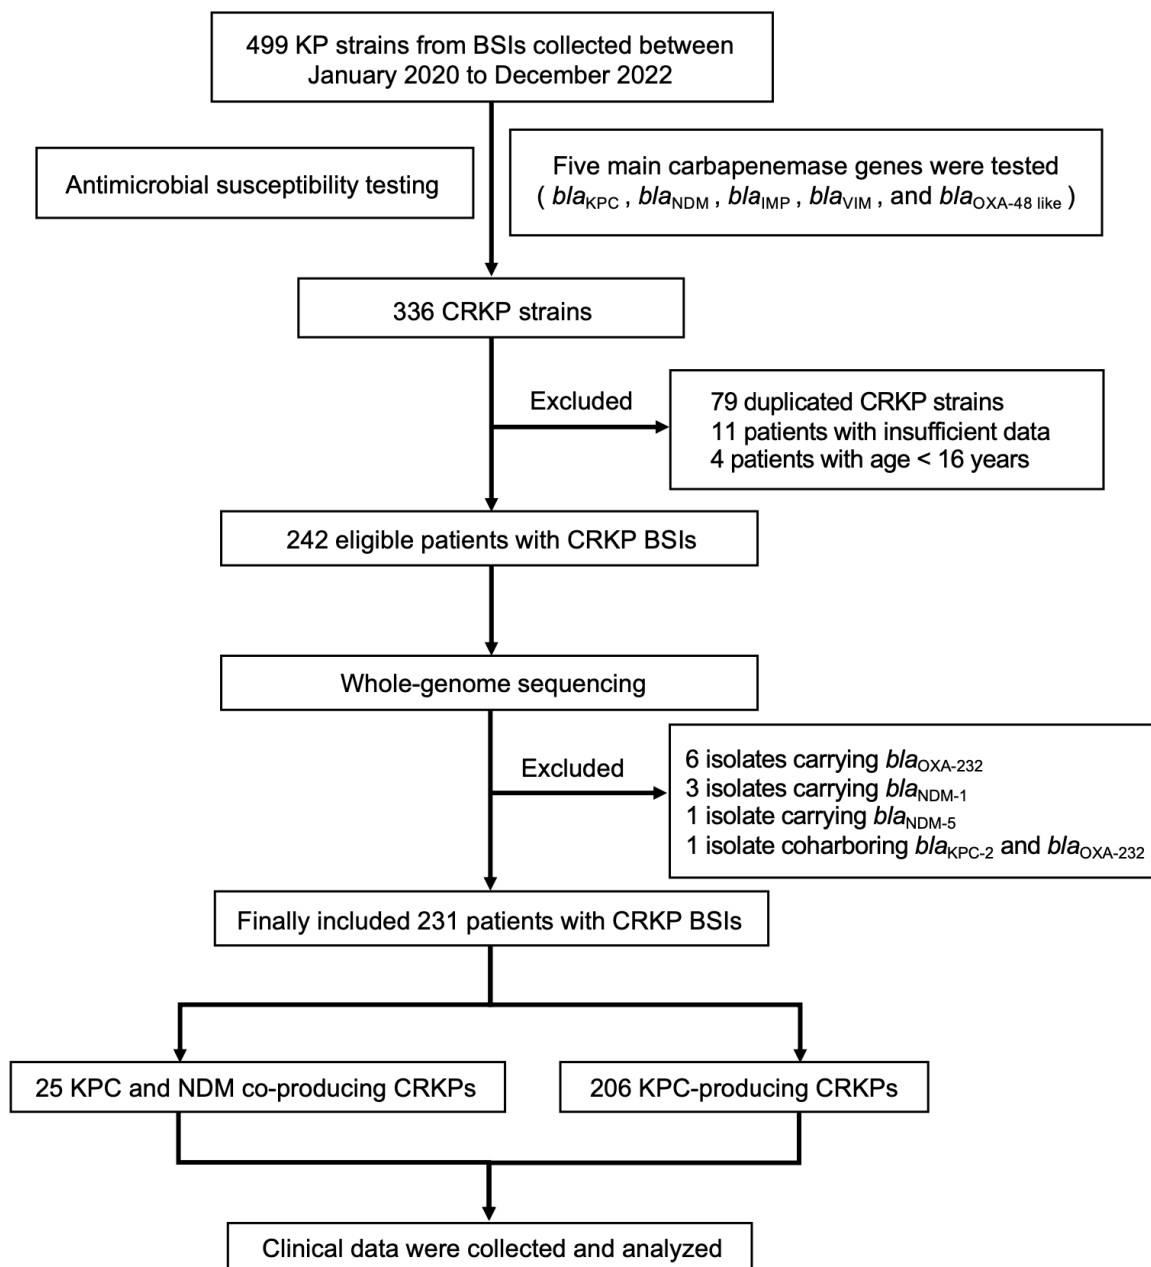

**Supplementary Figure S1:** The flowchart of this study

Abbreviations: *KPC*, *Klebsiella pneumoniae* carbapenemase; *NDM*, New Delhi metallo- $\beta$ -lactamase; *CRKP*, carbapenem-resistant *Klebsiella pneumoniae*; *KPC-NDM-CRKP*, KPC and NDM co-producing carbapenem-resistant *Klebsiella pneumoniae*; *KPC-CRKP*, KPC-producing carbapenem-resistant *Klebsiella pneumoniae*; *BSI*, bloodstream infection

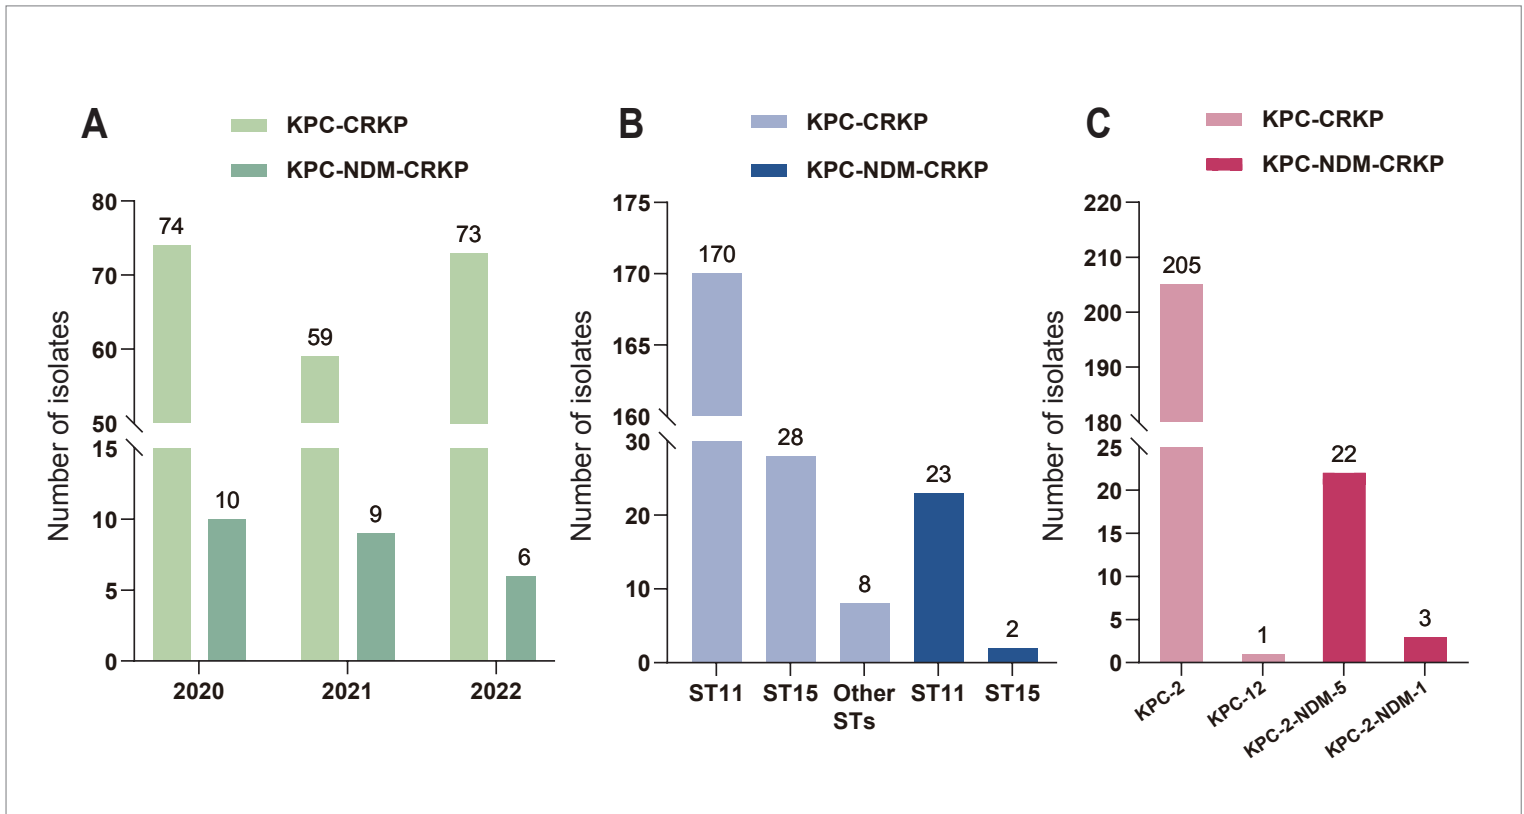

**Supplementary Figure S2:** (A) Prevalence of KPC-NDM-CRKPs and KPC-CRKPs under three years, 2020–2022; (B) STs of KPC-NDM-CRKPs and KPC-CRKPs; (C) KPC and NDM variants of KPC-NDM-CRKPs and KPC-CRKPs

Abbreviations: *KPC*, *Klebsiella pneumoniae* carbapenemase; *NDM*, New Delhi metallo- $\beta$ -lactamase; *CRKP*, carbapenem-resistant *Klebsiella pneumoniae*; *KPC-NDM-CRKP*, KPC and NDM co-producing carbapenem-resistant *Klebsiella pneumoniae*; *KPC-CRKP*, KPC-producing carbapenem-resistant *Klebsiella pneumoniae*; *ST*, sequence type
